# Supplementary material
Source: PubMed Central journal article supplement (PMC4568841)
Supplement: NIHMS687612-supplement-1.pdf [file NIHMS687612-supplement-1.pdf]

**Supplementary Table 1 PTSD and Hypertension**

| <b><u>Hypertension Positive Findings (Supportive of Early Senescence in PTSD)</u></b> |                                                                                                                                                                                                                                  |                                                                                                    |                                                                                                                     |                                                                                                                                                                                                                                                                                                                   |
|---------------------------------------------------------------------------------------|----------------------------------------------------------------------------------------------------------------------------------------------------------------------------------------------------------------------------------|----------------------------------------------------------------------------------------------------|---------------------------------------------------------------------------------------------------------------------|-------------------------------------------------------------------------------------------------------------------------------------------------------------------------------------------------------------------------------------------------------------------------------------------------------------------|
| <b>Study</b>                                                                          | <b>N, Gender, and Mean Age</b>                                                                                                                                                                                                   | <b>PTSD Diagnostic &amp; Assessment Methods</b>                                                    | <b>Description</b>                                                                                                  | <b>Findings</b>                                                                                                                                                                                                                                                                                                   |
| Lauterbach et al. 2005 (50)                                                           | National Comorbidity Survey<br><br>+PTSD: 429<br>-PTSD: 5448<br><br>Gender:<br>Full sample = 50% women<br>+ PTSD = 68.4% women<br><br>Mean (SD) age years:<br>Full sample 33.2 (10.7)<br>+ PTSD = 33.6 (9.8)                     | Modified version of the DSM-III-R PTSD module from the Diagnostic Interview Schedule (DIS)Qureshii | Retrospective self-report.<br>Primary outcome = self-report from checklist of medical disorders over preceding year | + PTSD ↑ 12 of 14 physical disorders, <b>including HTN</b> and cardiac disorders. ulcer, as well as any health problem                                                                                                                                                                                            |
| Kang et al. 2006 (55)                                                                 | WW II POWs: 19,442<br>+PTSD/+POW: 3,254<br>-PTSD/+POW: 16,188<br>+PTSD/-POW: 133<br>-PTSD/-POW: 9,595<br><br>Gender: All men<br><br>Mean age years in 1991:<br>POWs = 70.2 (SD not provided)<br>Non-POW = 69.9 (SD not provided) | PTSD diagnoses determined by record review                                                         | Retrospective follow-up of healthcare utilization (1991-2000). Primary outcome: six ICD-9 categories                | +PTSD/+POW versus +PTSD/ PTSD no significant differences in any CVD<br><br>+PTSD/+POW versus – PTSD/-POW ↑ <b>HTN</b> (OR, 1.26; 95% CI, 1.16–1.37), and CIHD (OR, 1.13; 95% CI, 1.04–1.22)<br><br>+PTSD/+POW versus – PTSD/+POW ↑ <b>HTN</b> (OR 1.25; 95% CI, 1.16–1.35), and CIHD (OR 1.19; 95% CI, 1.11–1.29) |
| Andersen et al.                                                                       | Data from electronic medical                                                                                                                                                                                                     | PTSD diagnoses established by                                                                      | Retrospective                                                                                                       | +PTSD associated with                                                                                                                                                                                                                                                                                             |

|                                  |                                                                                                                                                                                                                                                                                                                    |                                                                                                    |                                                                                                                                                                                          |                                                                                                                                                                                                                                                                   |
|----------------------------------|--------------------------------------------------------------------------------------------------------------------------------------------------------------------------------------------------------------------------------------------------------------------------------------------------------------------|----------------------------------------------------------------------------------------------------|------------------------------------------------------------------------------------------------------------------------------------------------------------------------------------------|-------------------------------------------------------------------------------------------------------------------------------------------------------------------------------------------------------------------------------------------------------------------|
| <p>2010 (51)</p>                 | <p>records for VISN 22 for OEF/OIF Veterans</p> <p>+PTSD: 1,258<br/>- PTSD: 3,158</p> <p>Mean age not provided</p> <p>Gender: 89% men</p>                                                                                                                                                                          | <p>Primary Care Physicians using DSM-IV criteria</p>                                               | <p>electronic chart review.</p> <p>Primary outcomes were timing of disease onset for eight categories of ICD-9 physical disorders.</p>                                                   | <p><b>greater risk HTN</b> (OR = 1.38; 95% CI 1.05–1.83, <math>p &lt; .05</math>). Adjusting for covariates, +PTSD associated with 56% increased risk of hypertensive disease (HR, 1.56, 95% CI, 1.19 –2.04).</p>                                                 |
| <p>Glaesmer et al. 2011 (52)</p> | <p>Population sample of Germans ages 60-85 years old</p> <p>+PTSD: 67<br/>+trauma/-PTSD: 423<br/>- trauma: 966</p> <p>Gender:<br/>+PTSD = 53.7% women<br/>+trauma/-PTSD = 52.7% women<br/>- trauma = 52.2 % women</p> <p>Age: + PTSD or + trauma/- PTSD significantly older than – trauma (means not provided)</p> | <p>PTSD diagnosed with Part 3 of the Posttraumatic Diagnostic Scale (PTDS) per DSM-IV criteria</p> | <p>Cross-sectional design.</p> <p>Primary outcome: Physical morbidity - # and severity of 21 common chronic conditions, plus an open category assessed via self-report questionnaire</p> | <p>+ PTSD ↑ risk “some” medical conditions relative to those – PTSD, including cardiovascular diseases, and cardiovascular risk factors (<b>HTN</b> and cholesterol) – ORs ranged from 1.94 for peripheral vascular disease to 3.76 for elevated cholesterol.</p> |
| <p>Kibler et al. 2009(53)</p>    | <p>Data from participants from National Comorbidity Study</p> <p>+PTSD/-MDD: 220<br/>+PTSD/+MDD: 209<br/>+MDD/-PTSD: 785<br/>HC: 2794</p> <p>Gender: 45% men, 55% women</p> <p>Mean age: 34 (10.8) years</p>                                                                                                       | <p>PTSD per DSM-III-R criteria using Composite International Diagnostic Interview (CIDI).</p>      | <p>Retrospective report.</p> <p>Primary outcomes: self-report of 14 health conditions for prior 12 months; for present report focus on hypertension</p>                                  | <p><b>+PTSD/-MDD highest rates of HTN</b> (14.5%) and significantly higher than HC (6.5%) and +MDD/-PTSD (9.7%). Results similar when compared +PTSD/+MDD with MDD only and HC groups.</p>                                                                        |

|                                       |                                                                                                                                                                                                                                                                                                                                                                           |                                                                                                                                           |                                                                                                                                                                                                                                           |                                                                                                                                                                                                                                                                                                                                                   |
|---------------------------------------|---------------------------------------------------------------------------------------------------------------------------------------------------------------------------------------------------------------------------------------------------------------------------------------------------------------------------------------------------------------------------|-------------------------------------------------------------------------------------------------------------------------------------------|-------------------------------------------------------------------------------------------------------------------------------------------------------------------------------------------------------------------------------------------|---------------------------------------------------------------------------------------------------------------------------------------------------------------------------------------------------------------------------------------------------------------------------------------------------------------------------------------------------|
| Pietrzak et al. 2012 (21)             | Adults aged > 60 years in Wave 2 National Epidemiologic Survey on Alcohol and Related Conditions (NESARC): 9463<br><br>Full PTSD: 469<br>Partial PTSD:545<br>Trauma exposed/-PTSD: 7519<br><br>Gender:<br>Full PTSD = 69.7% women<br>Partial PTSD = 65.7% women<br>Trauma exposed/-PTSD = 53.2 % women<br><br>Mean ages not provided, but all participants > age 60 years | Lifetime PTSD diagnosis via NIAAA Wave 2 Alcohol Use Disorder and Associated Disabilities Interview Schedule-DSM-IV CVersion (AUDADIS-IV) | Study design: Part of a longitudinal study but present analyses based on assessment of PTSD at Wave 2 and retrospective report of health for prior year.<br><br>Primary outcome: self-report of past year dx any of 17 medical conditions | After adjustment for demographics and psychiatric comorbidity, full PTSD was associated with ↑ <b>HTN</b> , angina pectoris, tachycardia, other heart disease, stomach ulcer, gastritis, and arthritis (ORs=1.3 to 1.8). Partial PTSD was associated with increased odds of gastritis (OR=1.7), angina pectoris (OR=1.5), and arthritis (OR=1.4). |
| Paulus et al 2013 (54)                | All participants from Iowa City Veterans Affairs Healthcare System (OEF/OIF service)<br><br>+PTSD: 88<br>-PTSD/+trauma: 27<br>-PTSD/-trauma: 150<br><br>Gender: All men<br><br>Age < 55 years; mean 26.0<br>+PTSD, 23.0 – PTSD                                                                                                                                            | PTSD status per VA chart review                                                                                                           | Retrospective chart review<br><br>Primary outcome was blood pressure and HR, but also examined rates of diagnosed and undiagnosed HTN.                                                                                                    | +PTSD and -PTSD groups similar diagnosed HTN (13.6% vs. 14.3%, respectively), but <b>+PTSD higher than –PTSD in undiagnosed HTN (20.5% vs. 2.0%, respectively).</b>                                                                                                                                                                               |
| <b>Hypertension Negative Findings</b> |                                                                                                                                                                                                                                                                                                                                                                           |                                                                                                                                           |                                                                                                                                                                                                                                           |                                                                                                                                                                                                                                                                                                                                                   |
| <b>Study</b>                          | <b>N, Gender, and Mean Age</b>                                                                                                                                                                                                                                                                                                                                            | <b>PTSD Diagnostic &amp; Assessment Methods</b>                                                                                           | <b>Description</b>                                                                                                                                                                                                                        | <b>Findings</b>                                                                                                                                                                                                                                                                                                                                   |
| David et al. 2004 (56)                | VA patients from Miami, FL VA: 93                                                                                                                                                                                                                                                                                                                                         | SCID (DSM-III-R or IV)                                                                                                                    | Cross-sectional<br>Primary outcomes: comorbid psychiatric                                                                                                                                                                                 | +PTSD ↑ several disorders <b>but no group differences in HTN.</b>                                                                                                                                                                                                                                                                                 |

|                        |                                                                                                                                                                                   |                                                                                                                                            |                                                                                                                                                 |                                                                                                                                                                                                                                                                                                                           |
|------------------------|-----------------------------------------------------------------------------------------------------------------------------------------------------------------------------------|--------------------------------------------------------------------------------------------------------------------------------------------|-------------------------------------------------------------------------------------------------------------------------------------------------|---------------------------------------------------------------------------------------------------------------------------------------------------------------------------------------------------------------------------------------------------------------------------------------------------------------------------|
|                        | PTSD: 55<br>Alcohol dependence: 38<br><br>Gender: All men<br><br>Mean (SD) Age years:<br>PTSD = 49.7 (5.7)<br>ETOH = 48.3 (8.0)                                                   |                                                                                                                                            | and medical conditions and health risk factors                                                                                                  |                                                                                                                                                                                                                                                                                                                           |
| Dobie et al. 2004 (59) | VA patients completing mail survey: 1206<br><br>+PTSD in past month: 266<br>-PTSD: 940<br><br>Gender: All women<br><br>Mean (SD) age years:<br>+PTSD = 42 (11)<br>-PTSD = 47 (15) | PTSD Checklist–Civilian Version (PCL-C)                                                                                                    | Cross-sectional design<br>Primary outcomes: self-reported medical history and health behaviors via Women’s Health Survey                        | +PTSD ↑ reported higher rates of a range of disorders), but not myocardial infarction or CAD: + PTSD = 4.7%; - PTSD = 5.1% (OR = 1.76; 0.86-3.60). <b>HTN was also non-significant + PTSD = 28.0% - PTSD = 29.1% (OR = 1.24 ; 95% CI 0.90-1.71)</b>                                                                       |
| Spiro et al. 2006 (58) | 2262 male Veterans in Veterans Health Study<br>+PTSD = 456<br>-PTSD 1455<br>MDD: 351<br><br>Mean age years”<br>+PTSD: 56<br>-PTSD: 64<br>MDD: 61<br><br>(SDs not provided)        | DSM-IV criteria were applied using information from the PTSD Checklist for Civilians (PCL-C), Traumatic Stress Scale, and the Combat Scale | Cross-sectional self-report<br><br>Primary outcomes: Health status: SF-36<br>22 self-reported conditions or symptoms from the comorbidity index | PTSD reported an average of 7.1 comorbid medical conditions compared to 4.5 among those with neither PTSD or depression (p<.001)<br><br>ORs (adjusted for age and depression) were significant (OR CI > 1.0) for angina, CHF, dermatitis, prostatitis, and stroke, <b>but not for BP</b> , diabetes, or enlarged prostate |
| Muhtz et al. 2011 (57) | Chronic PTSD: 25 Trauma-exposed/-PTSD: 25                                                                                                                                         | PTSD measured with self-report Posttraumatic Diagnostic                                                                                    | Cross-sectional                                                                                                                                 | +/- PTSD not differ on age, education, ETOH, BMI,                                                                                                                                                                                                                                                                         |

|                                    | <p>Subjects recruited from former east Germans displaced as children during WW II</p> <p>Gender:<br/>+PTSD = 64% women<br/>-PTSD = 64% women</p> <p>Mean (SD) age years:<br/>+PTSD = 71 (0.5)<br/>-PTSD = 71 (0.4)</p>                                                                                                                                                                                                   | Scale (PDS), but then verified with Structured Diagnostic Interview                                                                 | Primary outcome was metabolic syndrome but also reported on blood pressure                                                                                                                     | <p>antihypertensive meds, lipid or other prescription drugs, or history of medical diseases</p> <p><b>+/- PTSD not differ on fasting glucose, waist circumference, systolic and diastolic blood pressure, HDL and LDL cholesterol, hs-CRP, HbA1c, and thyrotropin, or ankle-brachial index.</b></p> |
|------------------------------------|--------------------------------------------------------------------------------------------------------------------------------------------------------------------------------------------------------------------------------------------------------------------------------------------------------------------------------------------------------------------------------------------------------------------------|-------------------------------------------------------------------------------------------------------------------------------------|------------------------------------------------------------------------------------------------------------------------------------------------------------------------------------------------|-----------------------------------------------------------------------------------------------------------------------------------------------------------------------------------------------------------------------------------------------------------------------------------------------------|
| <b>Hypertension Mixed Findings</b> |                                                                                                                                                                                                                                                                                                                                                                                                                          |                                                                                                                                     |                                                                                                                                                                                                |                                                                                                                                                                                                                                                                                                     |
| <b>Study</b>                       | <b>N, Gender, and Mean Age</b>                                                                                                                                                                                                                                                                                                                                                                                           | <b>PTSD Diagnostic &amp; Assessment Methods</b>                                                                                     | <b>Description</b>                                                                                                                                                                             | <b>Findings</b>                                                                                                                                                                                                                                                                                     |
| Walczevska et al. 2011 (60)        | <p>+PTSD: 80<br/>-PTSD: 70</p> <p>Inclusion criteria for PTSD group: (1) born 1928 – 1941, (2) deportation to Siberia, (3) minimum duration deportation 5 yrs, (4) +PTSD</p> <p>HC group born in same era, and gender matched but: (1) no traumatic history, (2) no PTSD</p> <p>Gender:<br/>+PTSD = 50.0% women<br/>- PTSD = 50.0% women</p> <p>Mean (SD) Age years:<br/>+ PTSD = 69.3 (5.9)<br/>- PTSD = 70.8 (4.9)</p> | <p>PTSD diagnosis established by direct interview verified using DSM-IV criteria</p> <p>Classified as mild, moderate, or severe</p> | <p>Cross-sectional design.</p> <p>Primary outcome: health status and cardiovascular risk.</p> <p>Detailed social, medical, and lifestyle history taken via patient report and chart review</p> | <p>+ PTSD significantly ↑ CAD, diabetes; as well as SBP, DBP, fasting blood glucose, total cholesterol, LDL, and triglycerides.</p> <p><b>HTN and CVD, more prevalent in + PTSD, but not reach statistical significance</b></p>                                                                     |
