# Supplementary material
Source: PubMed Central journal article supplement (PMC4568841)
Supplement: NIHMS687612-supplement-2.pdf [file NIHMS687612-supplement-2.pdf]

**Supplementary Table 2 PTSD and Heart/Cardiovascular Disease**

| <b><u>Cardiovascular Disease Positive Findings</u></b> |                                                                                                                                                                                                                            |                                                                                                       |                                                                                                                                                                    |                                                                                                                                                                                                                                                                                                                                                            |
|--------------------------------------------------------|----------------------------------------------------------------------------------------------------------------------------------------------------------------------------------------------------------------------------|-------------------------------------------------------------------------------------------------------|--------------------------------------------------------------------------------------------------------------------------------------------------------------------|------------------------------------------------------------------------------------------------------------------------------------------------------------------------------------------------------------------------------------------------------------------------------------------------------------------------------------------------------------|
| <b>Study</b>                                           | <b>N, Gender, and Mean Age</b>                                                                                                                                                                                             | <b>PTSD Diagnostic &amp; Assessment Methods</b>                                                       | <b>Description</b>                                                                                                                                                 | <b>Findings</b>                                                                                                                                                                                                                                                                                                                                            |
| Lauterbach et al. 2005 (50)                            | National Comorbidity Survey<br><br>+PTSD: 429<br>-PTSD: 5448<br><br>Gender:<br>Full sample = 50% women<br>+ PTSD = 68.4% women<br><br>Mean (SD) age years:<br>Full sample 33.2 (10.7)<br>+ PTSD = 33.6 (9.8)               | Modified version of the DSM-III-R PTSD module from the Diagnostic Interview Schedule (DIS)            | Retrospective self-report.<br>Primary outcome = self-report from checklist of medical disorders over preceding year                                                | + PTSD ↑ 12 of 14 physical disorders, including HTN and cardiac disorders. ulcer, as well as any health problem                                                                                                                                                                                                                                            |
| Sawchuk et al. 2005 (61)                               | People from Northern Plains tribe: 1414<br><br>+Lifetime PTSD: 208<br>-PTSD: 1206<br><br>Gender:<br>+ PTSD = 69% women<br>- PTSD = 48% women<br><br>Mean (95% CI) Age years:<br>+ PTSD = 37 (36-38)<br>- PTSD = 34 (34-34) | DSM-IV criteria for PTSD using World Health Organization Composite International Diagnostic Interview | Data from American Indian Service Utilization Psychiatric Epidemiology Risk and Protective Factors Project (AI-SUPERPPF)<br><br>Primary outcome: Self-reported CVD | 12% + PTSD had CVD versus 5% - PTSD (p <.01)<br><br>After adjusting for age, sex, and education, + PTSD OR for CVD = 2.4 (95% CI 1.4–4.1).<br><br>Adjusting for age, sex, and education, and CVD risk factors (diabetes, high blood pressure, smoking history, and a lifetime alcohol abuse/ Dependence) diagnosis + PTSD OR for CVD = 2.0 (95%CI 1.1–3.8) |

|                            |                                                                                                                                                                                                                                                     |                                                                                                                                                                |                                                                                                                                              |                                                                                                                                                                                                                                                                                                                                |
|----------------------------|-----------------------------------------------------------------------------------------------------------------------------------------------------------------------------------------------------------------------------------------------------|----------------------------------------------------------------------------------------------------------------------------------------------------------------|----------------------------------------------------------------------------------------------------------------------------------------------|--------------------------------------------------------------------------------------------------------------------------------------------------------------------------------------------------------------------------------------------------------------------------------------------------------------------------------|
| Kang et al. 2006 (55)      | <p>WW II POWs: 19,442<br/> +PTSD/+POW: 3,254<br/> -PTSD/+POW: 16,188<br/> +PTSD/-POW: 133<br/> -PTSD/-POW: 9,595</p> <p>Gender: All men</p> <p>Mean age years in 1991:<br/> POWs = 70.2 (SD not provided)<br/> Non-POW = 69.9 (SD not provided)</p> | PTSD diagnoses determined by record review                                                                                                                     | Retrospective follow-up of healthcare utilization (1991-2000). Primary outcome: six ICD-9 categories                                         | <p>+PTSD/+POW versus +PTSD/ PTSD no significant differences in any CVD</p> <p>+PTSD/+POW versus – PTSD/-POW ↑ HTN (OR, 1.26; 95% CI, 1.16–1.37), and CIHD (OR, 1.13; 95% CI, 1.04–1.22)</p> <p>+PTSD/+POW versus – PTSD/+POW ↑ HTN (OR 1.25; 95% CI, 1.16–1.35), and CIHD (OR 1.19; 95% CI, 1.11–1.29)</p>                     |
| Spiro et al. 2006 (58)     | <p>2262 male Veterans in Veterans Health Study<br/> +PTSD = 456<br/> -PTSD 1455<br/> MDD: 351</p> <p>Mean age years”<br/> +PTSD: 56<br/> -PTSD: 64<br/> MDD: 61</p> <p>(SDs not provided)</p>                                                       | DSM-IV criteria were applied using information from the PTSD Checklist for Civilians (PCL-C), Traumatic Stress Scale, and the Combat Scale                     | Cross-sectional self-report<br><br>Primary outcomes: Health status: SF-36 22 self-reported conditions or symptoms from the comorbidity index | <p>PTSD reported an average of 7.1 comorbid medical conditions compared to 4.5 among those with neither PTSD or depression (p&lt;.001)</p> <p>ORs (adjusted for age and depression) were significant (OR CI &gt; 1.0) for angina, CHF, dermatitis, prostatitis, and stroke, but not for BP, diabetes, or enlarged prostate</p> |
| Sledjeski et al. 2008 (62) | <p>Individuals from the National Comorbidity Survey-Replication (NCS-R): 5366</p> <p>+PTSD: 574<br/> +trauma/-PTSD: 4054</p>                                                                                                                        | Lifetime diagnosis via World Mental Health Survey Initiative Version of the World Health Organization Composite International Diagnostic Interview (WMH-CIDI). | Cross-sectional retrospective report<br>Primary outcomes: 15 self-reported medical conditions                                                | + PTSD highest risk arthritis/ rheumatism, back/neck pain, headaches, chronic pain, <b>heart disease</b> , and ulcers; those -trauma had the lowest rates                                                                                                                                                                      |

|                           |                                                                                                                                                                                                                                                                                                                                                                                                                   |                                                                                             |                                                                                                                                         |                                                                                                                              |
|---------------------------|-------------------------------------------------------------------------------------------------------------------------------------------------------------------------------------------------------------------------------------------------------------------------------------------------------------------------------------------------------------------------------------------------------------------|---------------------------------------------------------------------------------------------|-----------------------------------------------------------------------------------------------------------------------------------------|------------------------------------------------------------------------------------------------------------------------------|
|                           | <p>-trauma: 738</p> <p>Gender :<br/> +PTSD = 75.0% women<br/> +trauma/-PTSD = 49.3% women<br/> - trauma = 59.1% women</p> <p>3108 (52.8 weighted %)<br/> females and 2258 (47.2 weighted %)<br/> males</p> <p>Mean (SD) age years:<br/> +PTSD = 41.8 (0.8)<br/> +trauma/-PTSD = 45.2 (0.5)<br/> -trauma = 42.7 (1.1)</p>                                                                                          |                                                                                             |                                                                                                                                         | of chronic medical conditions, and traumatized individuals without PTSD fell in-between                                      |
| Spitzer et al. 2009 (63)  | <p>Community German adults: 3171</p> <p>+PTSD: 62<br/> +trauma/-PTSD: 1669<br/> -trauma/-PTSD: 1440</p> <p>Gender:<br/> +PTSD = 67.7% women<br/> +trauma/-PTSD = 50.1% women<br/> - trauma = 53.6% women</p> <p>Mean (SD) age years:<br/> +PTSD = 55.2 (16.6)<br/> +trauma/-PTSD = 57.3 (15.7)<br/> - trauma = 1651 women (52.1%)<br/> and 1520 men (47.9%); mean age<br/> of 53.7 (15.1) years = 49.6 (13.2)</p> | DSM-IV criteria per SCID PTSD Module                                                        | Cross sectional/retrospective report<br>Primary outcome: self-reported medical history as well as physical examination (for BP and BMI) | <b>For + PTSD significant ORs included ↑ angina (OR 2.4), heart failure (OR 3.4), and peripheral artery disease (OR 2.5)</b> |
| Glaesmer et al. 2011 (52) | <p>Population sample of Germans ages 60-85 years old</p> <p>+PTSD: 67</p>                                                                                                                                                                                                                                                                                                                                         | PTSD diagnosed with Part 3 of the Posttraumatic Diagnostic Scale (PTDS) per DSM-IV criteria | Cross-sectional design.<br>Primary outcome: Physical morbidity - #                                                                      | + PTSD ↑ risk “some” medical conditions relative to those – PTSD, <b>including cardiovascular diseases,</b>                  |

|                            |                                                                                                                                                                                                                                                                                                                                                                                            |                                                                                                                                                                                             |                                                                                                                                                                                                                                                  |                                                                                                                                                                                                                                                                                                                                                         |
|----------------------------|--------------------------------------------------------------------------------------------------------------------------------------------------------------------------------------------------------------------------------------------------------------------------------------------------------------------------------------------------------------------------------------------|---------------------------------------------------------------------------------------------------------------------------------------------------------------------------------------------|--------------------------------------------------------------------------------------------------------------------------------------------------------------------------------------------------------------------------------------------------|---------------------------------------------------------------------------------------------------------------------------------------------------------------------------------------------------------------------------------------------------------------------------------------------------------------------------------------------------------|
|                            | <p>+trauma/-PTSD: 423<br/>- trauma: 966</p> <p>Gender:<br/>+PTSD = 53.7% women<br/>+trauma/-PTSD = 52.7% women<br/>- trauma = 52.2 % women</p> <p>Age: + PTSD or + trauma/- PTSD significantly older than – trauma (means not provided)</p>                                                                                                                                                |                                                                                                                                                                                             | and severity of 21 common chronic conditions, plus an open category assessed via self-report questionnaire                                                                                                                                       | and cardiovascular risk factors (HTN and cholesterol) – ORs ranged from 1.94 for peripheral vascular disease to 3.76 for elevated cholesterol                                                                                                                                                                                                           |
| Pietrzak et al. 2012 (21)  | <p>Adults aged &gt; 60 years in Wave 2 National Epidemiologic Survey on Alcohol and Related Conditions (NESARC): 9463</p> <p>Full PTSD: 469<br/>Partial PTSD:545<br/>Trauma exposed/-PTSD: 7519</p> <p>Gender:<br/>Full PTSD = 69.7% women<br/>Partial PTSD = 65.7% women<br/>Trauma exposed/PTSD = 53.2 % women</p> <p>Mean ages not provided, but all participants &gt; age 60 years</p> | <p>Lifetime PTSD diagnosis via NIAAA Wave 2 Alcohol Use Disorder and Associated Disabilities Interview Schedule-DSM-IV CVersion (AUDADIS-IV)</p>                                            | <p>Study design: part of a longitudinal study but present analyses based on assessment of PTSD at Wave 2 and retrospective report of health for prior year.</p> <p>Primary outcome: self-report of past year dx any of 17 medical conditions</p> | <p>After adjustment for demographics and psychiatric comorbidity, full PTSD was associated with ↑ HTN, <b>angina pectoris, tachycardia, other heart disease</b>, stomach ulcer, gastritis, and arthritis (ORs=1.3 to 1.8). Partial PTSD was associated with increased odds of gastritis (OR=1.7), angina pectoris (OR=1.5), and arthritis (OR=1.4).</p> |
| Vaccarino et al. 2013 (64) | <p>Vietnam Era Twin Registry born between 1946 and 1956 with no baseline history of CHD: 562 (281 twin pairs)</p> <p>+PTSD: 137<br/>-PTSD: 425</p>                                                                                                                                                                                                                                         | <p>PTSD diagnosed in 1992 via DIS per DSM-III-R criteria (for 19 pairs DIS missing, so imputed based on MSC-PTSD score &gt; 80)</p> <p>15-item PTSD symptom scale also obtained in 1987</p> | <p>Prospective follow-up with median of 13-years.</p> <p>Primary outcome: CHD, other cardiovascular measures</p>                                                                                                                                 | <p><b>69 twins developed CHD during follow-up; incidence of CHD 22.6% in twins with PTSD vs. 8.9% in those without PTSD (p &lt;05)</b></p>                                                                                                                                                                                                              |

|                         |                                                                                                                                                                         |                            |                                                                                      |                                                                                                                                                                                                                   |
|-------------------------|-------------------------------------------------------------------------------------------------------------------------------------------------------------------------|----------------------------|--------------------------------------------------------------------------------------|-------------------------------------------------------------------------------------------------------------------------------------------------------------------------------------------------------------------|
|                         | Gender: All men<br><br>Mean (SD) age years:<br>+PTSD = 42.5 (2.4)<br>-PTSD = 42.7 (2.4)                                                                                 |                            |                                                                                      |                                                                                                                                                                                                                   |
| Turner et al. 2013 (65) | VA patients<br>+PTSD: 433<br>-PTSD: 230<br><br>Mean (SD) age years:<br>+PTSD: 58.2 (10.3)<br>-PTSD: 58.0 (11.6)<br><br>Gender (% women):<br>+PTSD: 10.4%<br>-PTSD: 3.2% | CAPS using DSM-IV criteria | Cross sectional study<br><br>Primary outcome:<br>Ischemia on exercise treadmill test | Obesity:<br>+PTSD = 42.6%<br>-PTSD = 31.2% (p = .003)<br><br><b>Ischemia: unadjusted OR: 1.93 (95% CI 1.21- 3.08; p =.006). Ischemia adjusted for age, sex, prior CVD OR = 2.07 (95% CI 1.27-3.36; p = .003).</b> |

**Cardiovascular Disease Negative Findings**

| <b>Study</b>           | <b>N, Gender, and Mean Age</b>                                                                                                                                                    | <b>PTSD Diagnostic &amp; Assessment Methods</b> | <b>Description</b>                                                                                                       | <b>Findings</b>                                                                                                                                                                                                                                        |
|------------------------|-----------------------------------------------------------------------------------------------------------------------------------------------------------------------------------|-------------------------------------------------|--------------------------------------------------------------------------------------------------------------------------|--------------------------------------------------------------------------------------------------------------------------------------------------------------------------------------------------------------------------------------------------------|
| Dobie et al. 2004 (59) | VA patients completing mail survey: 1206<br><br>+PTSD in past month: 266<br>-PTSD: 940<br><br>Gender: All women<br><br>Mean (SD) age years:<br>+PTSD = 42 (11)<br>-PTSD = 47 (15) | PTSD Checklist–Civilian Version (PCL-C)         | Cross-sectional design<br>Primary outcomes: self-reported medical history and health behaviors via Women’s Health Survey | +PTSD ↑ reported higher rates of a range of disorders), <b>but not myocardial infarction or CAD: + PTSD = 4.7%; - PTSD = 5.1% (OR = 1.76; 0.86-3.60)</b> . HTN was also non-significant + PTSD = 28.0% - PTSD = 29.1% (OR = 1.24 ; 95% CI 0.90-1.71)). |

**Cardiovascular Disease Mixed Findings**

| <b>Study</b> | <b>N, Gender, and Mean Age</b> | <b>PTSD Diagnostic &amp; Assessment Methods</b> | <b>Description</b> | <b>Findings</b> |
|--------------|--------------------------------|-------------------------------------------------|--------------------|-----------------|
|--------------|--------------------------------|-------------------------------------------------|--------------------|-----------------|

|                                    |                                                                                                                                                                                                                                                                                                                                                                                                                          |                                                                                                                                                                         |                                                                                                                                                                                         |                                                                                                                                                                                                                                            |
|------------------------------------|--------------------------------------------------------------------------------------------------------------------------------------------------------------------------------------------------------------------------------------------------------------------------------------------------------------------------------------------------------------------------------------------------------------------------|-------------------------------------------------------------------------------------------------------------------------------------------------------------------------|-----------------------------------------------------------------------------------------------------------------------------------------------------------------------------------------|--------------------------------------------------------------------------------------------------------------------------------------------------------------------------------------------------------------------------------------------|
| <p>Walczewska et al. 2011 (60)</p> | <p>+PTSD: 80<br/>-PTSD: 70</p> <p>Inclusion criteria for PTSD group: (1) born 1928 – 1941, (2) deportation to Siberia, (3) minimum duration deportation 5 yrs, (4) +PTSD</p> <p>HC group born in same era, and gender matched but: (1) no traumatic history, (2) no PTSD</p> <p>Gender:<br/>+PTSD = 50.0% women<br/>- PTSD = 50.0% women</p> <p>Mean (SD) Age years:<br/>+ PTSD = 69.3 (5.9)<br/>- PTSD = 70.8 (4.9)</p> | <p>PTSD diagnosis established by direct interview verified using DSM-IV criteria</p> <p>Classified as mild, moderate, or severe</p>                                     | <p>Cross-sectional design.</p> <p>Primary outcome: health status and cardiovascular risk. Detailed social, medical, and lifestyle history taken via patient report and chart review</p> | <p>+ PTSD significantly ↑ CAD, diabetes; as well as SBP, DBP, fasting blood glucose, total cholesterol, LDL, and triglycerides</p> <p><b><i>HTN and CVD, more prevalent in + PTSD, but not reach statistical significance</i></b></p>      |
| <p>Crum-Cianflone et al. (66)</p>  | <p>60,025 participants in the Millennium Cohort Study.</p> <p>+PTSD: 3,331<br/>- PTSD: 56,694</p> <p>Gender: +PTSD 34.4%, -PTSD 23.4% women</p> <p>Mean age at baseline 34.4 years (SD not specified)</p>                                                                                                                                                                                                                | <p>PTSD determined as participants reporting moderate or higher level of at least 1 intrusion, 3 avoidance, and 2 hyperarousal symptoms, with a PCL-C score of ≥50.</p> | <p>Longitudinal survey data.</p> <p>Primary outcome: Newly reported CHD</p>                                                                                                             | <p>+ PTSD associated ↑ CHD in age, sex, and race adjusted model (OR, 2.25; 95% CI 1.49–3.39). However, when adjusted for anxiety and depression, + PTSD no longer associated with new onset CHD (adjusted OR, 1.27; 95% CI, 0.76–2.12)</p> |
