# Supplementary material
Source: PubMed Central journal article supplement (PMC4568841)
Supplement: NIHMS687612-supplement-3.pdf [file NIHMS687612-supplement-3.pdf]

**Supplementary Table 3 PTSD and Metabolic Syndrome or Type 2 Diabetes**

| <b>Metabolic Syndrome Positive Findings</b> |                                                                                                                                                                                                                                                                                                                                                                                                                                                                                                                                                                                                                               |                                                                                                                                       |                                                                                                                |                                                                                                                                                                                                |
|---------------------------------------------|-------------------------------------------------------------------------------------------------------------------------------------------------------------------------------------------------------------------------------------------------------------------------------------------------------------------------------------------------------------------------------------------------------------------------------------------------------------------------------------------------------------------------------------------------------------------------------------------------------------------------------|---------------------------------------------------------------------------------------------------------------------------------------|----------------------------------------------------------------------------------------------------------------|------------------------------------------------------------------------------------------------------------------------------------------------------------------------------------------------|
| <b>Study</b>                                | <b>N, Gender, and Mean Age</b>                                                                                                                                                                                                                                                                                                                                                                                                                                                                                                                                                                                                | <b>PTSD Diagnostic &amp; Assessment Methods</b>                                                                                       | <b>Description</b>                                                                                             | <b>Findings</b>                                                                                                                                                                                |
| Heppner et al. 2009 (22)                    | <p>VA patients: 253 (92% men)<br/>                     +PTSD: 139<br/>                     Subthreshold PTSD: 60<br/>                     -PTSD: 54</p> <p>Gender:<br/>                     Full sample = 8% women (values not provided by subgroup)</p> <p>Mean (SD) Age years: Full sample 51.5 (9.0) (values not given by subgroup)</p>                                                                                                                                                                                                                                                                                    | <p>PTSD severity measured with Clinician-Administered PTSD Scale (CAPS); CAPS score &gt; 65 + DSM-IV criteria used to define PTSD</p> | <p>Cross-sectional design.<br/>                     Primary outcome = metabolic syndrome</p>                   | <p><b>43% of +PTSD sample met criteria for metabolic syndrome. 46% of those with PTSD &amp; MDD, 34% of those with PTSD only, 29% of those with MDD only (n=17) had metabolic syndrome</b></p> |
| Jin et al. 2009 (67)                        | <p>Outpatients &gt; age 40 with psychiatric symptoms warranting treatment with antipsychotic medications: 203</p> <p>PTSD: 33<br/>                     Schizophrenia: 65 Dementia: 56<br/>                     Mood disorder: 49</p> <p>Gender:<br/>                     PTSD = 12% women<br/>                     Schizophrenia = 26% women<br/>                     Dementia = 45% women<br/>                     Mood disorder = 39% women</p> <p>Mean (SD) Age years:<br/>                     PTSD = 59.7 (10.5)<br/>                     Schizophrenia = 58.3 (10.6)<br/>                     Dementia = 77.2 (9.8)</p> | <p>Diagnosis of PTSD and other psychiatric disorders established by treating psychiatrist per DSM-IV criteria</p>                     | <p>Cross sectional analyses.<br/>                     Primary outcome: AHA criteria for metabolic syndrome</p> | <p><b>AHA criteria for metabolic syndrome met by 72% of people with PTSD, 60% of people with schizophrenia, 58% with mood disorders, and 56% of people with dementia</b></p>                   |

|                                                    | Mood disorder: 67.1 (13.2)                                                                                                                                                                                                                                                                        |                                                            |                                                                                                                                                                                                                                 |                                                                                                                                                                                     |
|----------------------------------------------------|---------------------------------------------------------------------------------------------------------------------------------------------------------------------------------------------------------------------------------------------------------------------------------------------------|------------------------------------------------------------|---------------------------------------------------------------------------------------------------------------------------------------------------------------------------------------------------------------------------------|-------------------------------------------------------------------------------------------------------------------------------------------------------------------------------------|
| <b><u>Metabolic Syndrome Negative Findings</u></b> |                                                                                                                                                                                                                                                                                                   |                                                            |                                                                                                                                                                                                                                 |                                                                                                                                                                                     |
| <b>Study</b>                                       | <b>N and Gender</b>                                                                                                                                                                                                                                                                               | <b>PTSD Diagnostic &amp; Assessment Methods</b>            | <b>Description</b>                                                                                                                                                                                                              | <b>Findings</b>                                                                                                                                                                     |
| Linnville et al. 2011 (19)                         | Vietnam- era VA patients in Robert E. Mitchell Center for Prisoner of War Studies<br>+ current PTSD/+Repatriated Prisoner of War (RPW): 61<br>- current PTSD/+lifetime PTSD/+RPW: 29<br>-current or lifetime PTSD/+RPW: 196<br>- PTSD (combat experience but not POWs): 65<br><br>Gender: All men | PTSD psychiatrically assessed with DSM-IV criteria         | Cross-sectional data approximately 25 years after repatriation.<br><br>Primary outcome: Metabolic Syndrome using a modified National Cholesterol Education Program (NCEP) definition for the Adult Treatment Panel III criteria | Neither lifetime or current + PTSD, or current PTSD were significant predictors of metabolic syndrome.                                                                              |
| <b><u>Metabolic Syndrome Mixed Findings</u></b>    |                                                                                                                                                                                                                                                                                                   |                                                            |                                                                                                                                                                                                                                 |                                                                                                                                                                                     |
| <b>Study</b>                                       | <b>N, Gender, and Mean Age</b>                                                                                                                                                                                                                                                                    | <b>PTSD Diagnostic &amp; Assessment Methods</b>            | <b>Description</b>                                                                                                                                                                                                              | <b>Findings</b>                                                                                                                                                                     |
| Weiss et al 2011.(20)                              | 245 participants in a larger study of risk factors for PTSD among low income predominantly African American urban population<br><br>+current PTSD: 46<br>- current PTSD: 199<br><br>Mean age 45 years (SD not provided).<br><br>Gender: 69.6% women                                               | PTSD diagnosed per DSM-IV criteria determined through CAPS | Cross-sectional study.<br><br>Primary outcome metabolic syndrome per Adult Treatment Panel (ATP) III guidelines                                                                                                                 | <b>+ current PTSD higher rates of metabolic syndrome than – current PTSD (47.8% vs. 31.2%, p&lt;.05), but lifetime diagnosis of PTSD was not associated with metabolic syndrome</b> |
| <b><u>Type 2 Diabetes Positive Findings</u></b>    |                                                                                                                                                                                                                                                                                                   |                                                            |                                                                                                                                                                                                                                 |                                                                                                                                                                                     |

| Study                       | N, Gender, and Mean Age                                                                                                                                                                                                                                              | PTSD Diagnostic & Assessment Methods                                                          | Description                                                                                                              | Findings                                                                                                                                                                                                                                                                                |
|-----------------------------|----------------------------------------------------------------------------------------------------------------------------------------------------------------------------------------------------------------------------------------------------------------------|-----------------------------------------------------------------------------------------------|--------------------------------------------------------------------------------------------------------------------------|-----------------------------------------------------------------------------------------------------------------------------------------------------------------------------------------------------------------------------------------------------------------------------------------|
| Boyko et al. 2010 (69)      | Data from Millennium Cohort Study<br><br>+PTSD: 1,595<br>- PTSD: 42,115<br><br>Gender: 74% men<br><br>Mean age: not provided                                                                                                                                         | PTSD per DSM-IV criteria determined via self-report PTSD Checklist – Civilian Version (PCL-C) | Cross-sectional survey data.<br><br>Primary outcome: self-reported diagnosis of type 2 diabetes during preceding 3 years | <b>After adjusting for age, sex, race/ethnicity, education, and BMI, +PTSD associated with increased risk of self-reported type 2 diabetes mellitus (OR = 2.24; 95% CI 1.54–3.26)</b>                                                                                                   |
| Agyemang et al 2012 (68)    | Data from adults in Community Health Services for Asylum Seekers in the Netherlands<br><br>+PTSD men: 2,681<br>+ PTSD women: 1,967<br>-PTSD men: 66066<br>-PTSD women: 32,466<br><br>Gender: see above<br><br>Mean age not provided by over 80% of sample < 40 years | PTSD per clinical chart diagnosis                                                             | Retrospective chart review<br><br>Primary outcome: chart diagnosis of type 2 diabetes mellitus                           | <b>+ PTSD more likely than - PTSD to have type 2 diabetes mellitus among men (age-adjusted prevalence ratio (APR) = 1.40; 95% CI, 1.12–1.76) and women (APR = 1.22; 95% CI, 0.95–1.56)</b>                                                                                              |
| Lukaschek et al. 2013 (102) | Data from 2,970 adults in Cooperative Health Research in the Region of Augsburg study.<br><br>+PTSD: 50<br>Partial PTSD: 261<br><br>Gender: 48.4% men<br><br>Mean age 56.1 (SD unknown) years                                                                        | PTSD per ICD-10 criteria determined via a set of scales and added questions                   | Primary outcome: Type 2 diabetes mellitus                                                                                | <b>+PTSD more likely to have Type 2 Diabetes Mellitus than subjects with no traumatic event (OR: 3.18; 95% CI 1.44–7.03, p value 0.004). Results generally similar after adjusting for various potential confounds. Partial PTSD was not associated with increased risk of diabetes</b> |

| <b><u>Type 2 Diabetes Negative Findings</u></b> |                                                                                                                                                                            |                                                                                                                                            |                                                                                                                                                    |                                                                                                                                                                                                                                                                                                                          |
|-------------------------------------------------|----------------------------------------------------------------------------------------------------------------------------------------------------------------------------|--------------------------------------------------------------------------------------------------------------------------------------------|----------------------------------------------------------------------------------------------------------------------------------------------------|--------------------------------------------------------------------------------------------------------------------------------------------------------------------------------------------------------------------------------------------------------------------------------------------------------------------------|
| <b>Study</b>                                    | <b>N, Gender, and Mean Age</b>                                                                                                                                             | <b>PTSD Diagnostic &amp; Assessment Methods</b>                                                                                            | <b>Description</b>                                                                                                                                 | <b>Findings</b>                                                                                                                                                                                                                                                                                                          |
| Spiro et al. 2006 (58)                          | 2262 male Veterans in Veterans Health Study<br>+PTSD = 456<br>-PTSD 1455<br>MDD: 351<br><br>Mean age years”<br>+PTSD: 56<br>-PTSD: 64<br>MDD: 61<br><br>(SDs not provided) | DSM-IV criteria were applied using information from the PTSD Checklist for Civilians (PCL-C), Traumatic Stress Scale, and the Combat Scale | Cross-sectional self-report<br><br>Primary outcomes:<br>Health status: SF-36<br>22 self-reported conditions or symptoms from the comorbidity index | PTSD reported an average of 7.1 comorbid medical conditions compared to 4.5 among those with neither PTSD or depression (p<.001)<br><br>ORs (adjusted for age and depression) were significant (OR CI > 1.0) for angina, CHF, dermatitis, prostatitis, and stroke, <b>but not for BP, diabetes, or enlarged prostate</b> |
| <b><u>Type 2 Diabetes Mixed Findings</u></b>    |                                                                                                                                                                            |                                                                                                                                            |                                                                                                                                                    |                                                                                                                                                                                                                                                                                                                          |
| <b>None</b>                                     |                                                                                                                                                                            |                                                                                                                                            |                                                                                                                                                    |                                                                                                                                                                                                                                                                                                                          |
