# Supplementary material
Source: PubMed Central journal article supplement (PMC4568841)
Supplement: NIHMS687612-supplement-5.pdf [file NIHMS687612-supplement-5.pdf]

**Supplementary Table 5 PTSD and Dementia**

| <b>Dementia Positive Findings</b> |                                                                                                                                                                                                                                                                                                                                                                |                                                                                               |                                                                                                                                                                                      |                                                                                                                |
|-----------------------------------|----------------------------------------------------------------------------------------------------------------------------------------------------------------------------------------------------------------------------------------------------------------------------------------------------------------------------------------------------------------|-----------------------------------------------------------------------------------------------|--------------------------------------------------------------------------------------------------------------------------------------------------------------------------------------|----------------------------------------------------------------------------------------------------------------|
| <b>Study</b>                      | <b>N, Gender, and Mean Age</b>                                                                                                                                                                                                                                                                                                                                 | <b>PTSD Diagnostic &amp; Assessment Methods</b>                                               | <b>Description</b>                                                                                                                                                                   | <b>Findings</b>                                                                                                |
| Qureshi et al. 2010 (72)          | +PTSD/-Purple Heart (PH): 3660 (3616 men, 44 women)<br><br>-PTSD/+PH: 1503 (1502 men, 1 woman)<br><br>+PTSD/-PH: 153 (all men)<br><br>-PTSD/-PH: 5165 (5123 men, 42 women)<br><br>Gender (see above)<br><br>Mean Age (SD) years in September 1999:<br><br>+PTSD/-PH = 73.9 (5.3)<br>-PTSD/+PH = 73.7 (5.0)<br>+PTSD/+PH = 73.3 (4.7)<br>-PTSD/-PH = 73.8 (5.2) | International Classification of Diseases, Ninth Revision, Clinical Modification (ICD-9) codes | Retrospective review of VA administrative database<br><br>Primary outcome: Incidence and prevalence of dementia in older PTSD+ and PTSD- Veterans with or without Purple Hearts (PH) | <b>PTSD+/PH- had significantly higher incidence and prevalence of dementia than PTSD- with or without a PH</b> |
| Yaffe et al. 2010 (73)            | Data from the VA National Patient Care Database<br>+PTSD: 53,155 (51,986 men and 1169 women)<br><br>-PTSD: 127,938 (122,820 men and 5118 women)<br><br>Gender (see above)<br><br>Mean (SD; range) Age years:                                                                                                                                                   | Veterans with IDC-9-CM code for PTSD on at least two different visits                         | Retrospective cohort study.<br><br>Primary outcome risk of developing dementia.                                                                                                      | <b>+ PTSD ↑ risk of developing incident dementia compared to those – PTSD (HR 2.31; 95% CI 2.24-2.39)</b>      |

|                                                              |                                                                                                                                                                                                     |                                     |                                                                                                                                     |                                                                                                                                                                                                                                                                                                                                                                        |
|--------------------------------------------------------------|-----------------------------------------------------------------------------------------------------------------------------------------------------------------------------------------------------|-------------------------------------|-------------------------------------------------------------------------------------------------------------------------------------|------------------------------------------------------------------------------------------------------------------------------------------------------------------------------------------------------------------------------------------------------------------------------------------------------------------------------------------------------------------------|
|                                                              | +PTSD = 66.2 (9.0; 55.0-100.0)<br>- PTSD = 69.9 (8.2; 55.0 – 100.0)                                                                                                                                 |                                     |                                                                                                                                     |                                                                                                                                                                                                                                                                                                                                                                        |
| Meziab et al. 2014 (74)                                      | Data from 182,879 Veterans VA National Patient Care Database<br>+PTSD/+POW: 150<br>+PTSD/-POW: 5,964<br>-PTSD/+POW: 334<br>-PTSD/-POW: 176,431<br><br>Mean age: +POW 76.5 (4.76)<br>=POW 68.4 (7.8) | Clinical diagnostic codes per ICD-9 | Retrospective analysis of electronic medical records.<br><br>Primary outcome: dementia – defined by broad range of diagnostic codes | <b>50% increase in the risk of dementia with POW status alone (HR, 1.56; 95% CI, 1.26–1.92); 75% increased risk of Dementia in PTSD alone (HR,1.78; 95% CI, 1.66–1.90), and &gt;two-fold increase among +PTSD/+POW (HR, 2.39; 95% CI, 1.84–3.11). Interaction between POW status and PTSD status non-significant, indicating an additive/ independent association.</b> |
| <b>Dementia Positive Findings Negative or Mixed Findings</b> |                                                                                                                                                                                                     |                                     |                                                                                                                                     |                                                                                                                                                                                                                                                                                                                                                                        |
| <b>None</b>                                                  |                                                                                                                                                                                                     |                                     |                                                                                                                                     |                                                                                                                                                                                                                                                                                                                                                                        |
